# Supplementary material
Source: Springer Nature journal article supplement (https://www.springermedizin.de/resource/supplementary/12889_2014_7432_MOESM1_ESM.pdf/9497488)
Supplement: MOESM1 [file 9497488]

## Monterégie

## Neuchâtel

### A) High level of knowledge

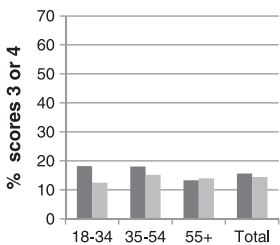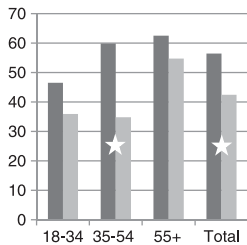

■ Women  
■ Men

### B) Perceived individual susceptibility

'Without any preventive measures, the risk that I contract Lyme disease in my region is high or very high'

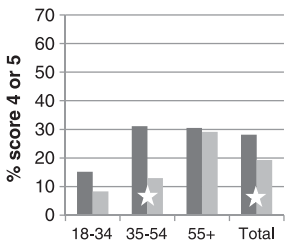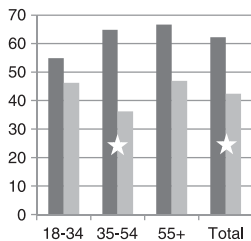

■ Women  
■ Men

### C) Perceived regional susceptibility

'Without any preventive measures, the risk that residents from my region contract Lyme disease is high or very high'

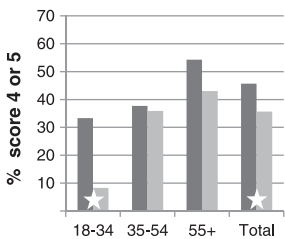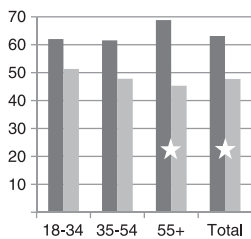

■ Women  
■ Men

### D) Perceived severity

'Lyme disease is a very severe disease'

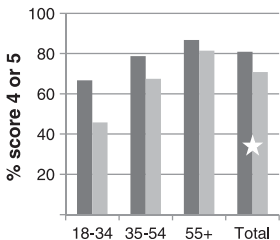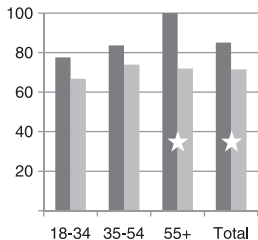

■ Women  
■ Men

### E) Feeling of worry

'I am worry by the idea of contracting Lyme disease'

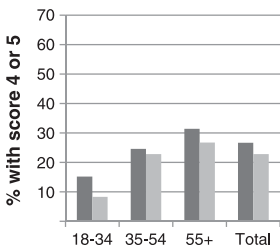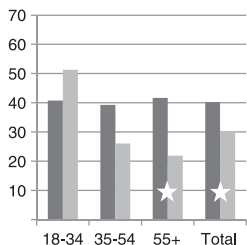

■ Women  
■ Men
